# Supplementary material for: The DNA Landscape: Development and Application of a New Framework for Visual Communication about DNA
Source: Atypon-hosted journal article supplement (doi:10.1187/cbe.22-01-0007), 2022-08-22
Supplement: combinedsupmats.pdf [file combinedsupmats.pdf]

# Supplemental Material

CBE—Life Sciences Education

Wright *et al.*

**Supplemental Table 1.** Introductory and Advanced Biology Textbooks used in all three phases of the study. Title, author list, publisher and date are reported for each textbook used. The total number of figures used for each of the three stages is listed. Note, only 9 textbooks were used for the Themes study.

|                     | <b>Textbook</b>                               | <b>Author(s)</b>                                                                                            | <b>Publisher (Year)</b>          | <b>Themes</b> | <b>Initial Framework</b> | <b>Landscape Framework</b> |
|---------------------|-----------------------------------------------|-------------------------------------------------------------------------------------------------------------|----------------------------------|---------------|--------------------------|----------------------------|
| <b>Introductory</b> | <i>Principles of Life</i>                     | David Hillis, David Sadava, Craig Heller & Mary Price                                                       | Sinauer Associates (2012)        | 18            | 68                       | 106                        |
|                     | <i>Biological Science</i> 6th Edition         | Scott Freeman, Kim Quillin, Lizabeth Allison, Michael Black, Greg Podgorski, Emily Taylor & Jeff Carmichael | Pearson Education (2017)         | 24            | 55                       | 122                        |
|                     | <i>Campbell Biology In Focus</i> 2nd Edition  | Michael Cain, Lisa Urry, Steven Wasserman, Peter Minorsky, Jane Reece                                       | Pearson Education (2016)         | 24            | 63                       | 132                        |
|                     | <i>Biology</i> 10th Edition                   | Eldra Solomon, Charles Martin, Diana Martin & Linda Berg                                                    | Cengage Learning (2015)          | 20            | 55                       | 99                         |
|                     | <i>Discover Biology</i> 6th Edition           | Anu Singh-Cundy & Gary Shin                                                                                 | W.W. Norton & Company (2015)     | 9             | 21                       | 64                         |
|                     | <i>Biology Now</i> 2nd Edition                | Anne Houtman, Megan Schudellari, & Cindy Malone                                                             | W.W. Norton & Company (2018)     | 9             | 16                       | 46                         |
| <b>Advanced</b>     | <i>World of the Cell</i> 9th Edition          | Jeff Hardin & Gregory Bertoni                                                                               | Pearson Education (2016)         | 23            | 116                      | 189                        |
|                     | <i>Principles of Cell Biology</i> 2nd Edition | George Plopper                                                                                              | Jones & Bartlett Learning (2016) | 12            | 54                       | 68                         |
|                     | <i>Lewin's Essential Genes</i> 3rd Edition    | Jocelyn E Krebs, Elliott S Goldstein, & Stephen T Kilpatrick                                                | Jones & Bartlett Learning (2012) | 41            | 559                      | 468                        |
|                     | <i>Molecular Cell Biology</i> 8th             | Harvey Lodish, Arnold Berk, Chris Kaiser, Monty Krieger,                                                    | W.H. Freeman and Company         | N/A           | 192                      | 235                        |

|              |                                                                            |                                                                             |                                           |     |       |       |
|--------------|----------------------------------------------------------------------------|-----------------------------------------------------------------------------|-------------------------------------------|-----|-------|-------|
|              | Edition                                                                    | Anthony<br>Bretscher, Hidde<br>Ploegh, Angelika<br>Amon, & Kelsey<br>Martin | (2016)                                    |     |       |       |
|              | <i>Principles<br/>of Genetics</i><br>7th Edition                           | D. Peter<br>Snustad &<br>Michael<br>Simmons                                 | John Wiley<br>& Sons<br>(2016)            | N/A | 309   | 266   |
|              | <i>Essential<br/>Genetics A<br/>Genomic<br/>Perspective</i><br>6th Edition | Daniel L. Hartl                                                             | Jones &<br>Bartlett<br>Learning<br>(2014) | N/A | 228   | 251   |
| <b>Total</b> |                                                                            |                                                                             |                                           | 170 | 1,736 | 2,046 |
